# Supplementary material
Source: Springer Nature journal article supplement (https://www.springermedizin.de/resource/supplementary/12879_2012_2413_MOESM4_ESM.pdf/9444310)

# Comparison of Frequency of Adverse Drug Events by Drug Level

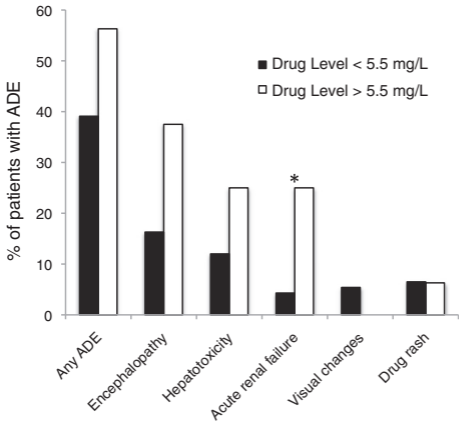

\*p-value < 0.05

Supplement: MOESM4 [file 9444310]
